# Supplementary material for: Familial Hypercholesterolemia: a Review of the Natural History, Diagnosis, and Management
Source: Springer Nature journal article supplement (doi:10.1007/s40119-015-0037-z), 2015-03-13
Supplement: MOESM1 [file 9339398]

- The true prevalence of homozygous and heterozygous familial hypercholesterolemia (HoFH and HeFH, respectively) is currently underestimated, with worldwide variation in its diagnosis.
- Untreated patients with HoFH usually have significant morbidity and mortality by the second decade of their lives.
- Diagnosis requires a combination of clinical manifestation of the disease, family history, lipid levels, and genetic testing .
- HeFH and HoFH should be managed using a combination of statins, ezetimibe, bile acid sequestrants, and lipoprotein apheresis.
- Newer agents such as lomitapide, mipomersen, and pro-protein convertase subtilisin/kexin 9 (PCSK9) inhibitors are providing vital therapeutic alternatives.

This summary slide represents the opinions of the authors. No funding or sponsorship was received for this study or publication of this article. For a full list of acknowledgments and conflicts of interest for all authors of this article, please see the full text online. Copyright © The Author(s) 2015. Creative Commons Attribution Noncommercial License (CC BY-NC).
